# Supplementary material
Source: publisher figshare collection journal article supplement (https://gsajournals.figshare.com/ndownloader/files/17768252)
Supplement: Supplementary file 1 [file 17768252]

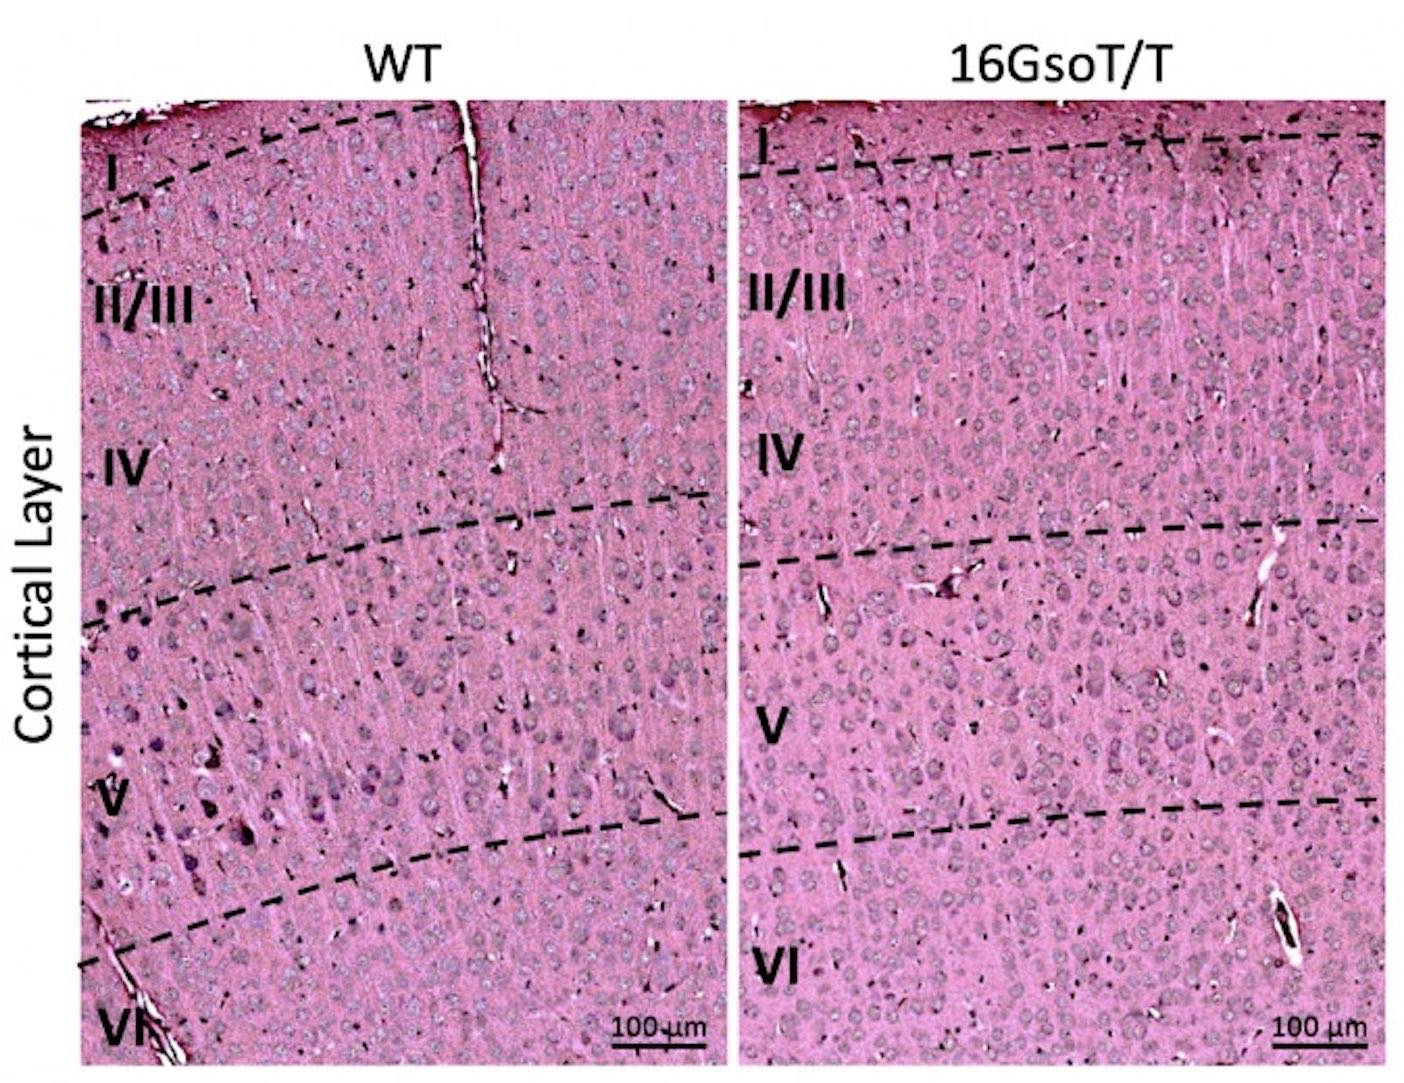


**Figure S1. Cortical layers in both WT (left) and 16Gso T/T (right) at P14.** H&E staining was used to identify the cortical layering in both WT and 16GsoT/T mutants. It showed 16GsoT/T mutants have normal layering and structure of cortex.
